# Supplementary material for: Village-level climate and weather variability, mediated by village-level crop yield, is associated with linear growth in children in Uganda
Source: HighWire-hosted journal article supplement (doi:10.1136/bmjgh-2020-002696), 2020-10-01
Supplement: bmjgh-2020-002696supp001_data_supplement.pdf [file bmjgh-2020-002696supp001_data_supplement.pdf]

| Crops yield (kg/ha) | Mean     | SD       | Types    |
|---------------------|----------|----------|----------|
| Arabica coffee      | 93.49    | 207.8    | Non-food |
| Banana              | 2898.05  | 2799.16  | Food     |
| Barley              | 0        | 0        | Food     |
| Beans               | 440.22   | 349.66   | Food     |
| Cassava             | 4430.35  | 3131.16  | Food     |
| Chickpeas           | 54.98    | 316.34   | Food     |
| Cocoa               | 125.9    | 193.5    | Food     |
| Coconut             | 1.88     | 31.67    | Food     |
| Cotton              | 651.92   | 476.59   | Non-food |
| Cowpeas             | 620.12   | 701.16   | Food     |
| Groundnuts          | 626.63   | 473.68   | Food     |
| Lentils             | 0        | 0        | Food     |
| Maize               | 2994.09  | 1984.27  | Food     |
| Oil of palm         | 0        | 0        | Non-food |
| Other cereals       | 0        | 0        | Food     |
| Other fiber crop    | 0        | 0        | Food     |
| Other oil seed      | 701.64   | 281.87   | Food     |
| Other pulses        | 357.04   | 357.18   | Food     |
| Other roots         | 30.33    | 511.55   | Food     |
| Pearl millet        | 5.67     | 78.39    | Food     |
| Pigeon Pea          | 284.44   | 476.27   | Food     |
| Plantain            | 3492.19  | 4538.94  | Food     |
| Potatoes            | 2695.41  | 4603.43  | Food     |
| Rape seed           | 0        | 0        | Non-food |
| Rest of crop        | 903.7    | 459.51   | Food     |
| Rice                | 584.32   | 927.41   | Food     |
| Robusta coffee      | 293.09   | 350.64   | Non-food |
| Sesame seed         | 422.15   | 540.36   | Food     |
| Small millet        | 1781.06  | 1726     | Food     |
| Sorghum             | 984.84   | 576.45   | Food     |
| Soybean             | 638.87   | 618.2    | Food     |
| Sugar beet          | 0        | 0        | Non-food |
| Sugar cane          | 27036.65 | 17986.14 | Non-food |
| Sunflower           | 1024.04  | 589.14   | Food     |
| Sweet potatoes      | 3849.62  | 3107.77  | Food     |
| Tea                 | 1566.31  | 1049.23  | Food     |
| Temperate fruit     | 5029.04  | 2718.99  | Food     |
| Tobacco             | 1065.97  | 638.66   | Non-food |

|                |         |         |      |
|----------------|---------|---------|------|
| Tropical fruit | 6717.33 | 5625.31 | Food |
| Vegetables     | 4168.38 | 2466.11 | Food |
| Wheat          | 291.36  | 704.82  | Food |
| Yam            | 0       | 0       | Food |

**Supplemental Table 1:**Summary statistics of agricultural yield of 42 crops. SD: standard deviation

| Crops             | Coefficient Estimate |
|-------------------|----------------------|
| Intercept         | -1.2                 |
| Arabica Coffee    | -0.05                |
| Banana            | 0                    |
| Yams              | 0                    |
| Wheat             | -0.007               |
| Vegetables        | 0                    |
| Tropical Fruit    | -0.0007              |
| Tobacco           | 0                    |
| Temperate Fruit   | 0                    |
| Tea               | 0                    |
| Sweet Potato      | 0.001                |
| Sunflower         | 0                    |
| Sugarcane         | 0.0003               |
| Sugarbeet         | 0                    |
| Soybean           | -0.01                |
| Sorghum           | -0.004               |
| Small Millet      | -0.005               |
| Sesame Seed       | 0.01                 |
| Rice              | 0.002                |
| Rest of Crops     | -0.005               |
| Robusta Coffee    | 0                    |
| Rapeseed          | 0                    |
| Pigeonpea         | 0                    |
| Potato            | 0                    |
| Pearl Millet      | -0.005               |
| Plantain          | 0                    |
| Other Roots       | 0                    |
| Other Pulses      | 0.013                |
| Other Oil Crops   | 0.003                |
| Oil Palm          | 0                    |
| Other Fiber Crops | 0                    |
| Other Cereals     | 0                    |
| Maize             | 0.0005               |
| Lentil            | 0                    |
| Groundnut         | 0.009                |
| Cowpea            | 0                    |
| Cotton            | 0.002                |
| Cocoa             | 0                    |
| Coconut           | -0.095               |
| Chickpea          | 0.005                |
| Cassava           | -0.0007              |
| Bean              | 0.009                |
| Barley            | 0                    |

**Supplemental Table 2.** Predicting height-for-age z-scores, with crop yield. Model was estimated using the LASSO method, which does not give SE estimates. With the exception of plantains (the major staple food crop in the most of the Ugandan population) crops whose coefficient estimates were zero were not explored in the casual mediation analysis.
